# Supplementary material for: Cost-Effective Simultaneous Determination of τ- and π-Methylhistidine in Dairy Bovine Plasma from Large Cohort Studies Using Hydrophilic Interaction Ultra-High Performance Liquid Chromatography Coupled to Tandem Mass Spectrometry
Source: MDPI journal article supplement (doi:10.3390/separations10020144), 2023-02-20
Supplement: s1 [file s1]

## Supplementary Material (SM) for

# Cost-Effective Simultaneous Determination of $\tau$ - and $\pi$ -Methylhistidine in Dairy Bovine Plasma from Large Cohort Studies Using Hydrophilic Interaction Ultra-High Performance Liquid Chromatography Coupled to Tandem Mass Spectrometry

Ioannis Sampsonidis <sup>1,2,\*</sup>, Maria Marinaki <sup>2,3,4</sup>, Anastasia Pesiridou <sup>2,3,4</sup>, Helen Gika <sup>2,4,5,\*</sup>, Georgios Theodoridis <sup>2,3,4</sup>, Nektarios Siachos <sup>6</sup>, Georgios Arsenos <sup>6</sup> and Stavros Kalogiannis <sup>1,2</sup>

1 Department of Nutritional Sciences and Dietetics, International Hellenic University, Sindos Campus, GR57400 Thessaloniki, Greece

2 FoodOmicsGR Research Infrastructure, AUTH Node, Center for Interdisciplinary Research and Innovation (CIRI-AUTH), Balkan Center B1.4, 10th Km Thessaloniki-Thermi Rd., P.O. Box 8318, GR57001 Thessaloniki, Greece

3 Department of Chemistry, Faculty of Sciences, Aristotle University of Thessaloniki, GR54124 Thessaloniki, Greece

4 Biomic AUTH, Center for Interdisciplinary Research and Innovation (CIRI-AUTH), Balkan Center B1.4, 10th Km Thessaloniki-Thermi Rd., P.O. Box 8318, GR57001 Thessaloniki, Greece

5 School of Medicine, Aristotle University of Thessaloniki, GR54124 Thessaloniki, Greece

6 Laboratory of Animal Husbandry, Faculty of Veterinary Medicine, School of Health Sciences, Aristotle University of Thessaloniki, GR54124 Thessaloniki, Greece;

\* Correspondence: isampson@nutr.teithe.gr (I.S.); gkikae@auth.gr (H.G.)

This document provides more detailed information to the main paper mentioned above.

The following information is included:

| Contents                                                                                                                                                                                                                                                                                                                                                                                                    | Page |
|-------------------------------------------------------------------------------------------------------------------------------------------------------------------------------------------------------------------------------------------------------------------------------------------------------------------------------------------------------------------------------------------------------------|------|
| Figure S1. Structures and identifiers for $\tau$ - and $\pi$ -methylhistidine                                                                                                                                                                                                                                                                                                                               | 2    |
| Figure S2. Fragments and abundances of $\tau$ -MH with increasing collision energy (Top from left to right: CE 10, 20 and 30 V) along with transition optimization results for ion 124m/z (Bottom)                                                                                                                                                                                                          | 3    |
| Figure S3. Fragments and abundances of $\pi$ -MH with increasing collision energy (Top from left to right: CE 10, 20 and 30 V) along with transition optimization results for ion 95m/z (Bottom).                                                                                                                                                                                                           | 4    |
| Figure S4. (A): Mass spectrum at a CE of 15 V for $\tau$ -MH. The spectrum is an average of 50 scans, from 10 to 172 m/z for the precursor 170 m/z. Ion 124 is the most intense peak in the spectrum, (B): Mass spectrum at a CE of 30 V for $\pi$ -MH. The spectrum corresponds to the average of 50 scans, from 10 to 172 m/z for the precursor 170 m/z. Ion 95 is the most intense peak in the spectrum. | 5    |
| Table S1. Concentrations of the quality control samples for $\tau$ -MH and $\pi$ -MH                                                                                                                                                                                                                                                                                                                        | 6    |

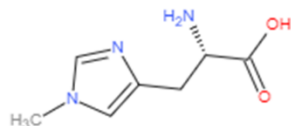

**τ-methylhistidine**

| Name              | Value                                                                                   |
|-------------------|-----------------------------------------------------------------------------------------|
| InChI             | InChI=1S/C7H11N3O2/c1-10-3-5(9-4-10)2-6(8)7(11)12/h3-4,6H,2,8H2,1H3,(H,11,12)/t6-/m0/s1 |
| InChIKey          | BRMWTNUJHUMWMS-LURJTMIESA-N                                                             |
| molecular formula | C7H11N3O2                                                                               |
| total exact mass  | 169.0851                                                                                |
| SMILES            | <chem>O=C(O)C(N)CC=1N=CN(C1)C</chem>                                                    |

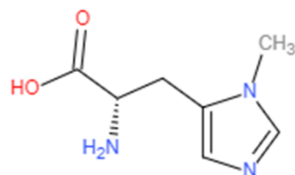

**π-methylhistidine**

| Name              | Value                                                                                   |
|-------------------|-----------------------------------------------------------------------------------------|
| InChI             | InChI=1S/C7H11N3O2/c1-10-4-9-3-5(10)2-6(8)7(11)12/h3-4,6H,2,8H2,1H3,(H,11,12)/t6-/m0/s1 |
| InChIKey          | JDHILDINMRGULE-LURJTMIESA-N                                                             |
| molecular formula | C7H11N3O2                                                                               |
| total exact mass  | 169.0851                                                                                |
| SMILES            | <chem>O=C(O)C(N)CC1=CN=CN1C</chem>                                                      |

All information compiled from MassBank of North America (MoNA). (<https://mona.fiehnlab.ucdavis.edu/>)

The content of the MoNA database is licensed under CC BY 4.0. (<https://creativecommons.org/licenses/by/4.0/>)

Figure S1. Structures and identifiers for τ- and π-methylhistidine

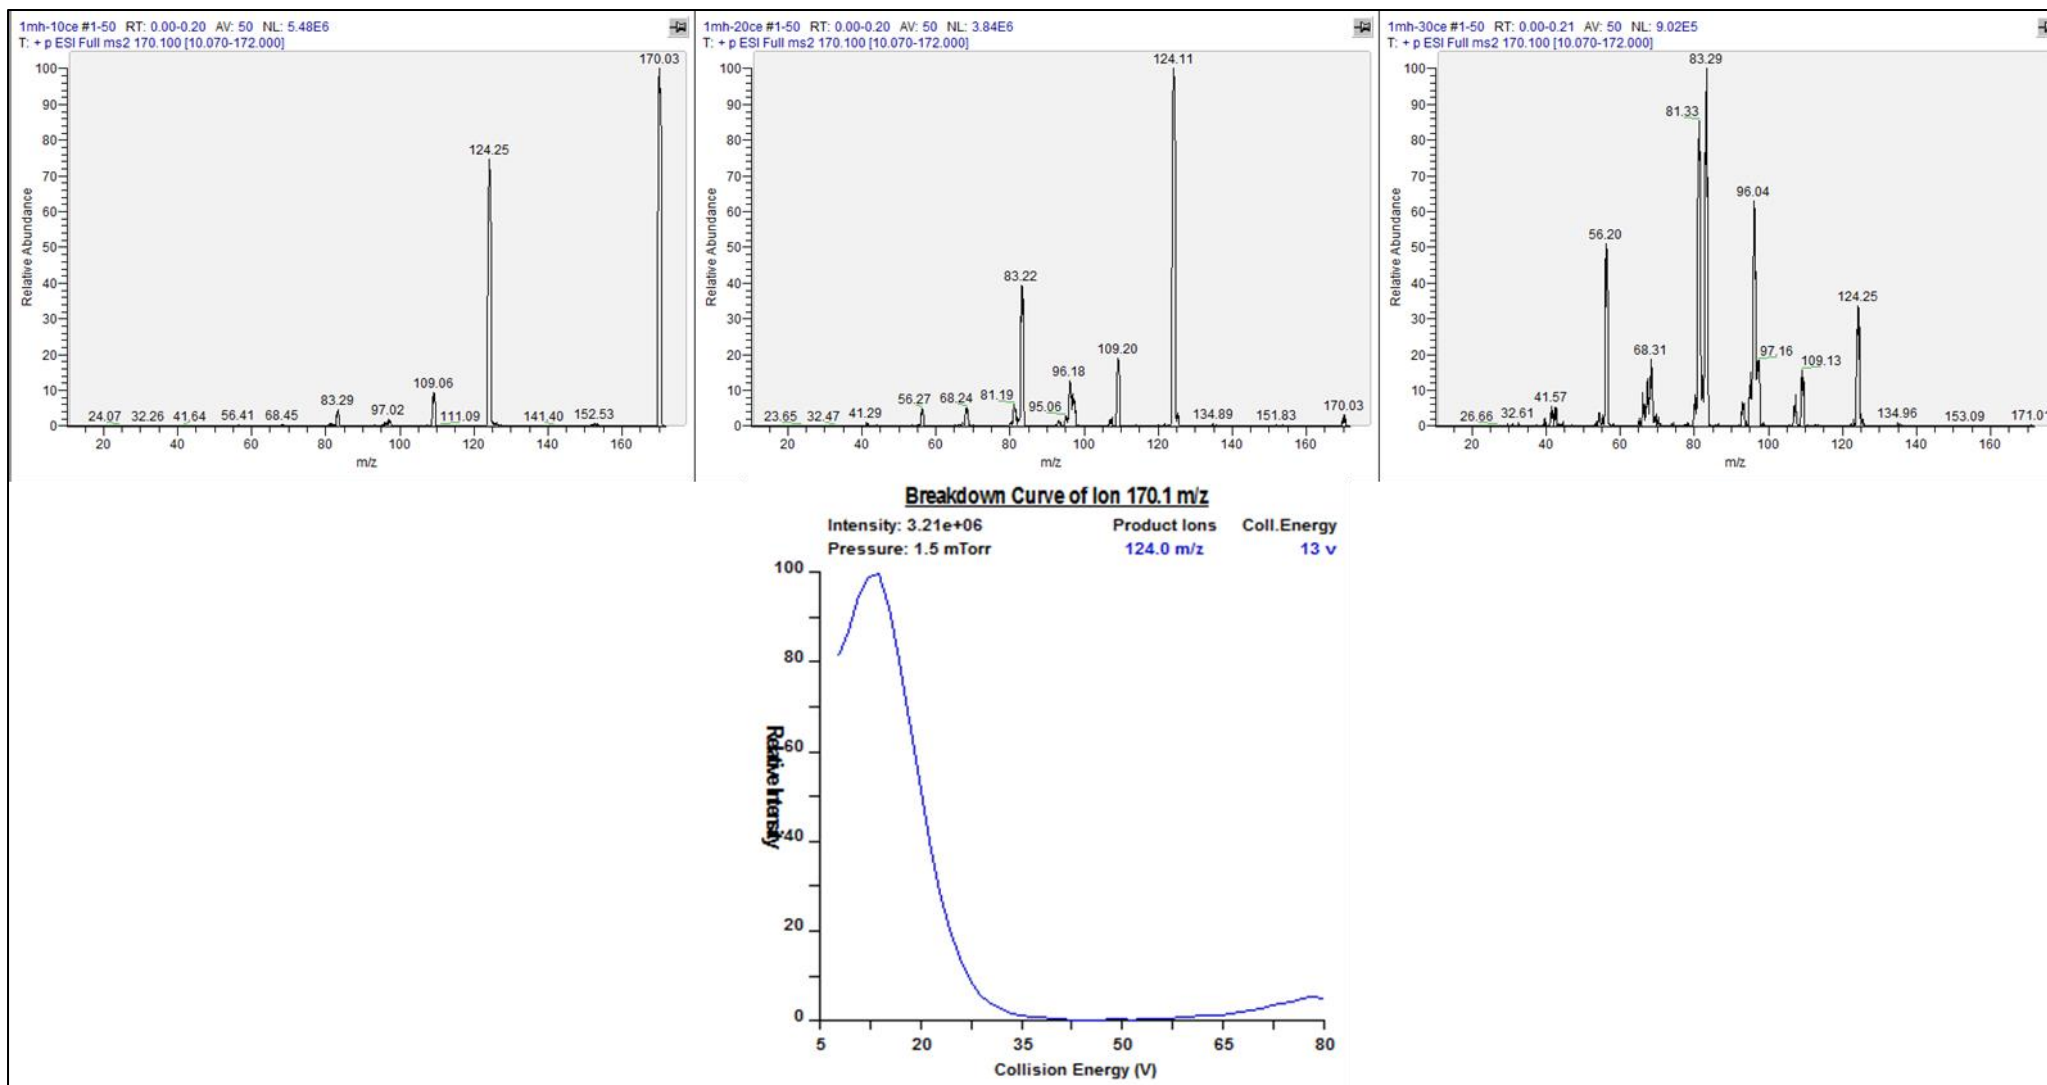

Figure S2. Fragments and abundances of  $\tau$ -MH with increasing collision energy (Top from left to right: CE 10, 20 and 30 V) along with transition optimization results for ion 124m/z (Bottom). Images produced explicitly for academic review purposes from Thermo Scientific™ Qual Browser in Thermo Xcalibur version 3.063. All content remains in copyright of their respective owners.

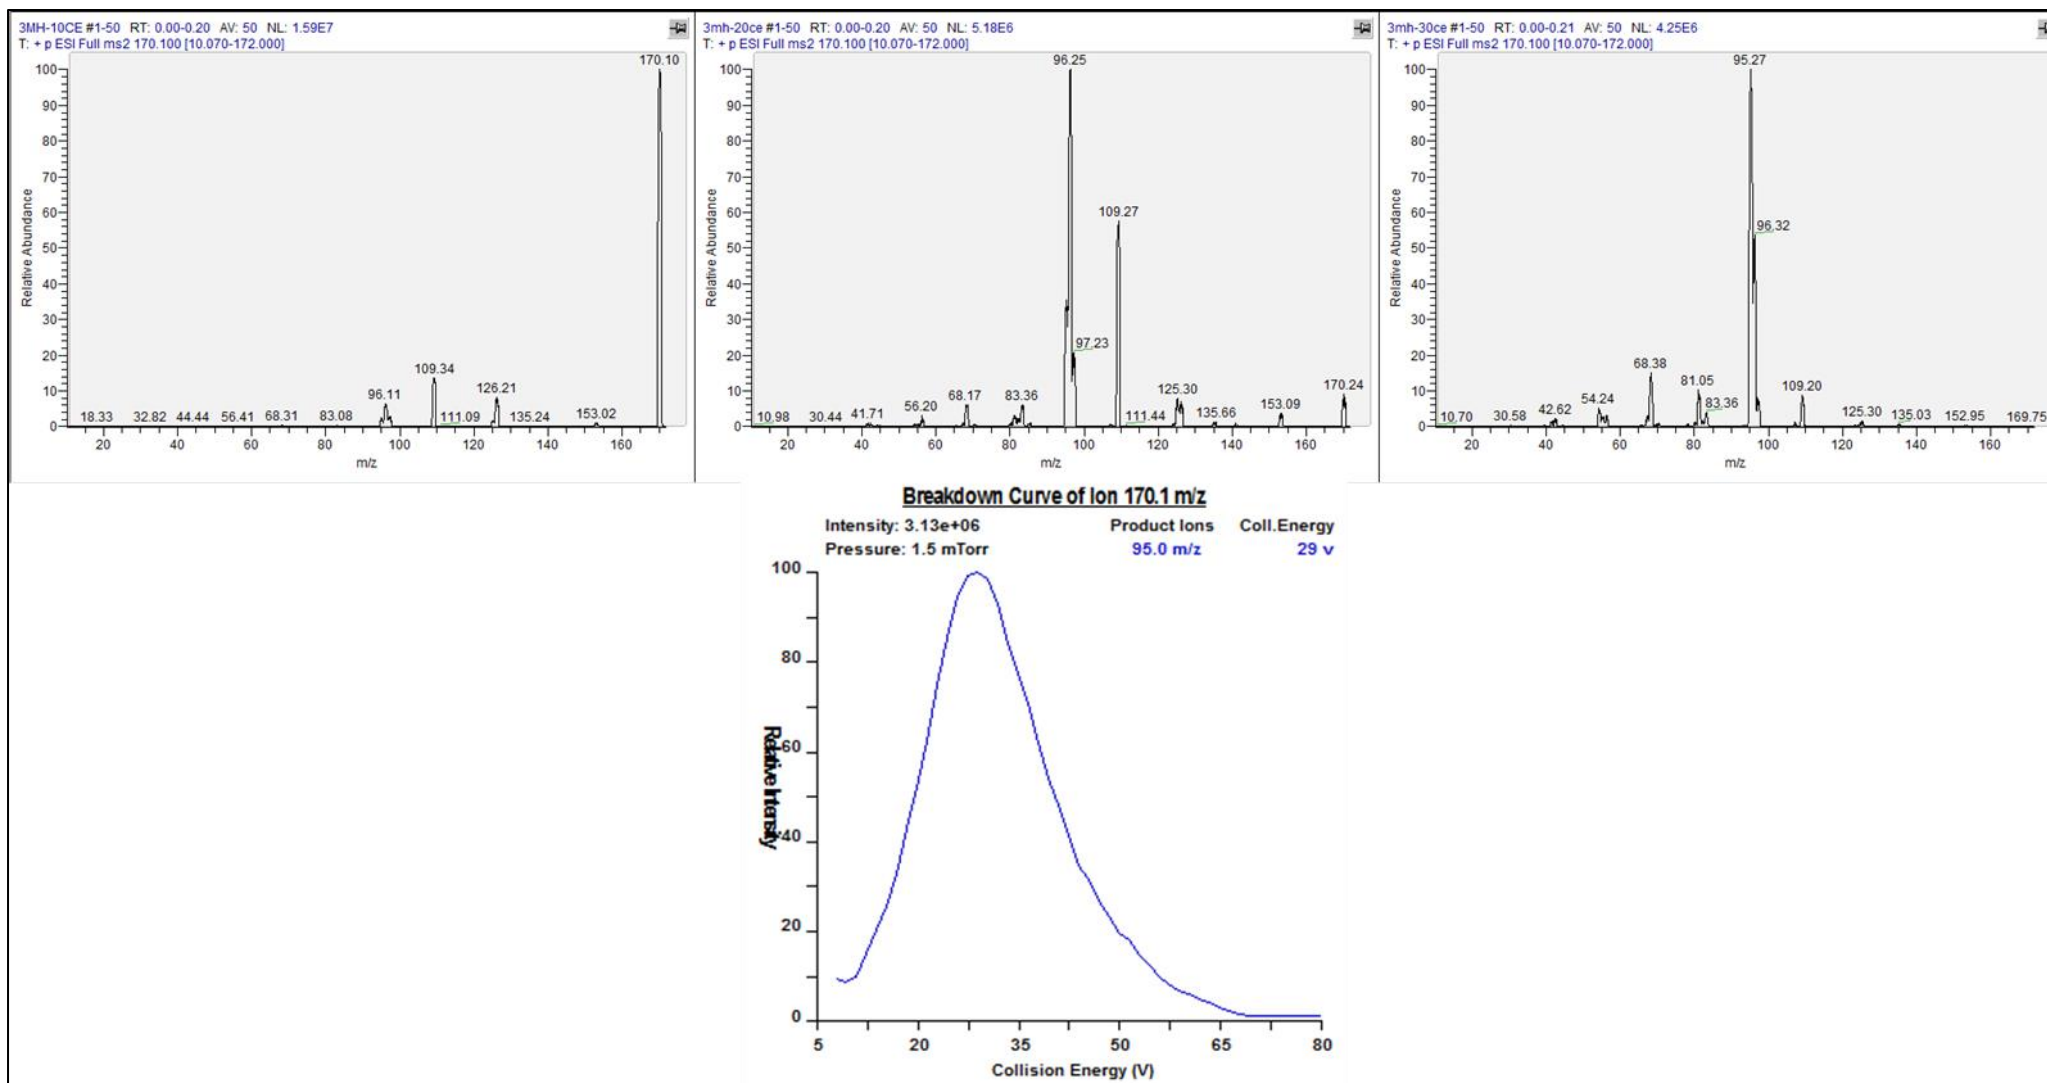

Figure S3. Fragments and abundances of  $\pi$ -MH with increasing collision energy (Top from left to right: CE 10, 20 and 30 V) along with transition optimization results for ion 95m/z (Bottom). Images produced explicitly for academic review purposes from Thermo Scientific™ Qual Browser in Thermo Xcalibur version 3.063. All content remains in copyright of their respective owners.

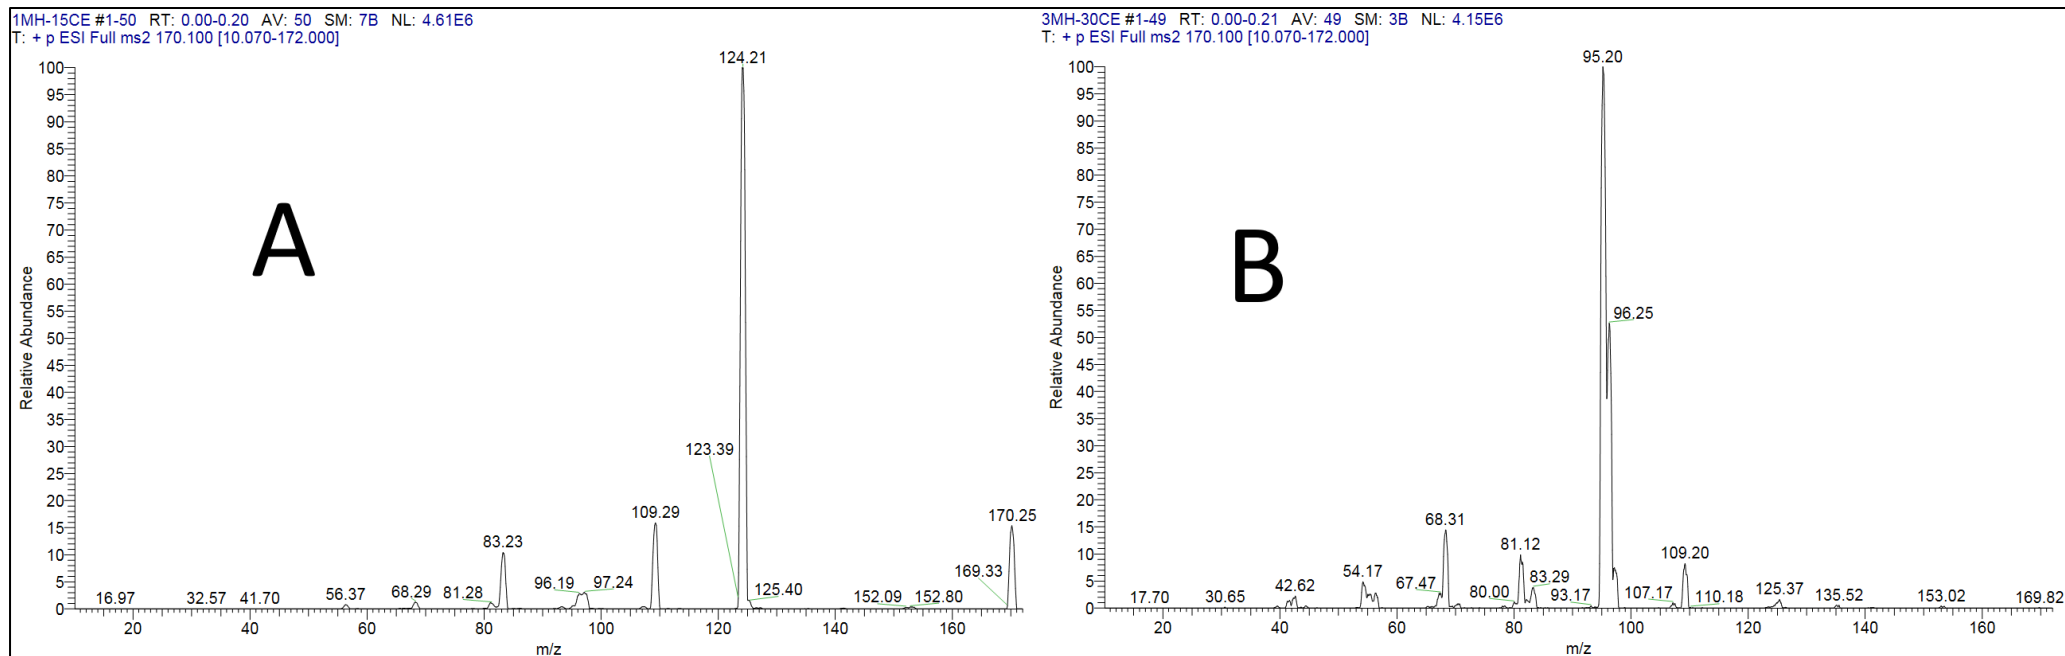

Figure S4. (A): Mass spectrum at a CE of 15 V for  $\tau$ -MH. The spectrum is an average of 50 scans, from 10 to 172 m/z for the precursor 170 m/z. Ion 124 is the most intense peak in the spectrum, (B): Mass spectrum at a CE of 30 V for  $\pi$ -MH. The spectrum corresponds to the average of 50 scans, from 10 to 172 m/z for the precursor 170 m/z. Ion 95 is the most intense peak in the spectrum.

Table S1. Concentrations of the quality control samples for  $\tau$ -MH and  $\pi$ -MH

| Solution type | Concentration [ $\mu\text{g/L}$ ] |           |
|---------------|-----------------------------------|-----------|
|               | $\tau$ -MH                        | $\pi$ -MH |
| LQC           | 425.2                             | 354.5     |
| MQC           | 850.4                             | 708.9     |
| HMQC          | 1170.4                            | 1028.9    |
| HQC           | 1410.4                            | 1268.9    |
